# Supplementary material
Source: PubMed Central journal article supplement (PMC7159018)
Supplement: mmc1.pdf [file mmc1.pdf]

# THE LANCET

## Infectious Diseases

### Supplementary appendix

This appendix formed part of the original submission and has been peer reviewed. We post it as supplied by the authors.

Supplement to: Dong E, Du H, Gardner L. An interactive web-based dashboard to track COVID-19 in real time. *Lancet Infect Dis* 2020; published online Feb 19. [https://doi.org/10.1016/S1473-3099\(20\)30120-1](https://doi.org/10.1016/S1473-3099(20)30120-1).

## Appendix: An interactive web-based dashboard to track COVID-19 in real-time

Ensheng Dong<sup>1</sup>, Hongru Du<sup>1</sup>, and Lauren Gardner<sup>1</sup>

<sup>1</sup>Department of Civil and Systems Engineering, Johns Hopkins University, Baltimore MD 21218, USA

To whom correspondence should be addressed; E-mail: l.gardner@jhu.edu

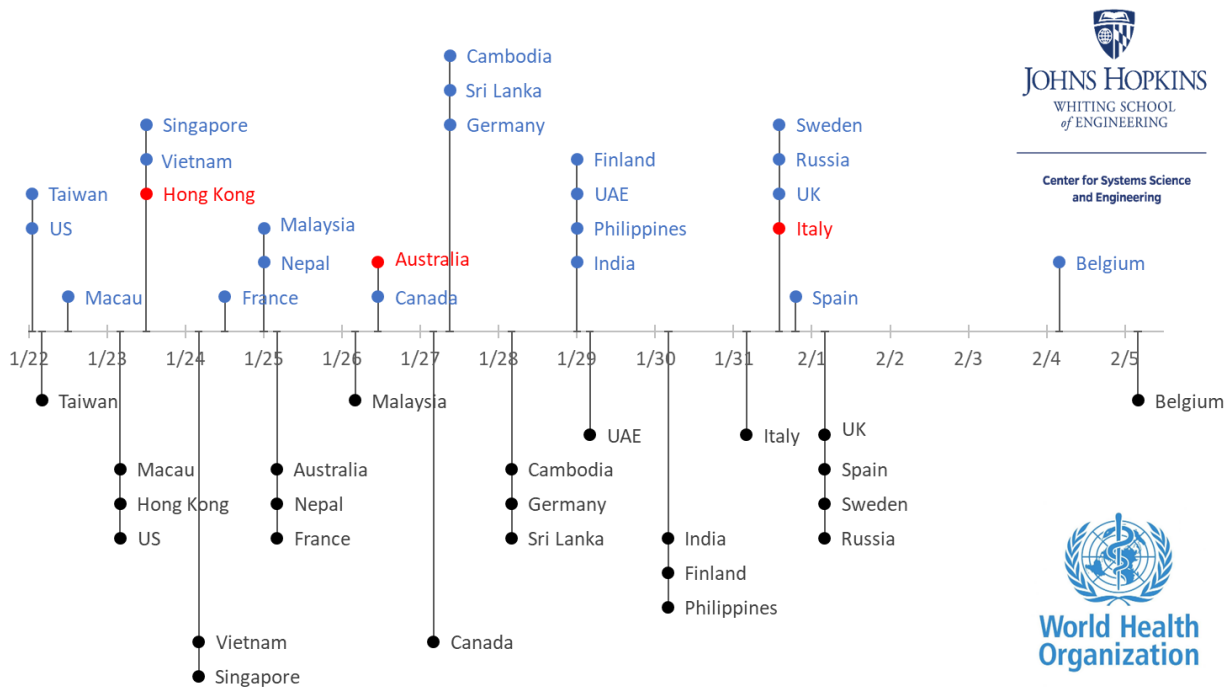

\*Thailand, S.Korea and Japan not shown, as reported before dashboard start date

**Figure: Comparison of COVID-19 case reporting between JHU CSSE, the WHO and CCDC.** Timeline illustrates when the first case of COVID-19 was reported in each affected country based on when the country first appeared on the CSSE dashboard (on top) relative to when it first appeared in a WHO situation report (on bottom). The countries listed in blue were reported by CSSE before the WHO, and those listed in red were reported after the WHO.

## References

1. World Health Organization “Novel Coronavirus (2019-nCoV) situation reports”.
2. JHU CSSE Coronavirus COVID-19 Global Cases: <https://arcg.is/0fHmTX>
